# Supplementary material for: Surface passivation of titanium dioxide via an electropolymerization method to improve the performance of dye-sensitized solar cells
Source: Royal Society of Chemistry journal article supplement (doi:10.1039/c5ra25406j), 2016-01-01
Supplement: c5ra25406j1.pdf [file c5ra25406j1.pdf]

**Supplementary data**

**Surface Passivation of Titanium Dioxide via Electropolymerization Method to  
Improve the Performance of Dye-Sensitized Solar Cells**

Mohammad Mazloun-Ardakani <sup>a,\*</sup>, Alireza Khoshroo <sup>a</sup>, Nima Taghavinia<sup>b</sup>, Laleh  
Hosseinzadeh<sup>a</sup>

<sup>a</sup>*Department of Chemistry, Faculty of Science, Yazd University, Yazd, 89195-741, I.R. Iran*

<sup>b</sup>Physics Department, Sharif University of Technology, Tehran 14588, Islamic Republic of Iran

E-Mail: mazloun@yazduni.ac.ir

Phone No: 00983518211670

Fax No: 00983518210644

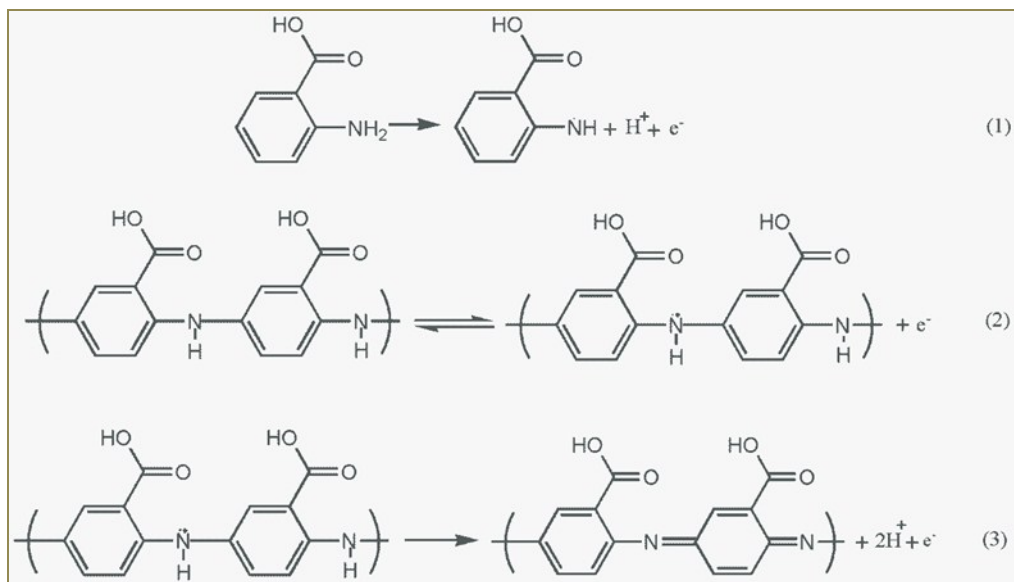

**Fig. 1S** Mechanism for electropolymerization of PAA

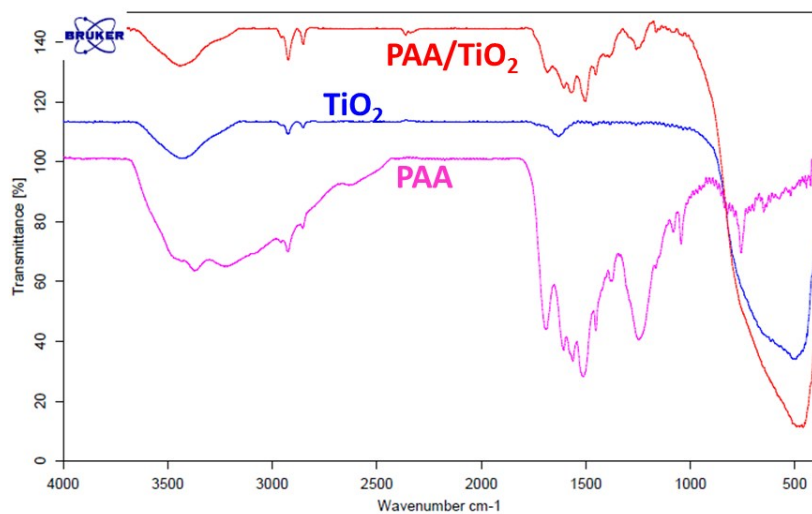

**Fig. 2S** FT-IR spectra of PAA, TiO<sub>2</sub> and PAA/ TiO<sub>2</sub>

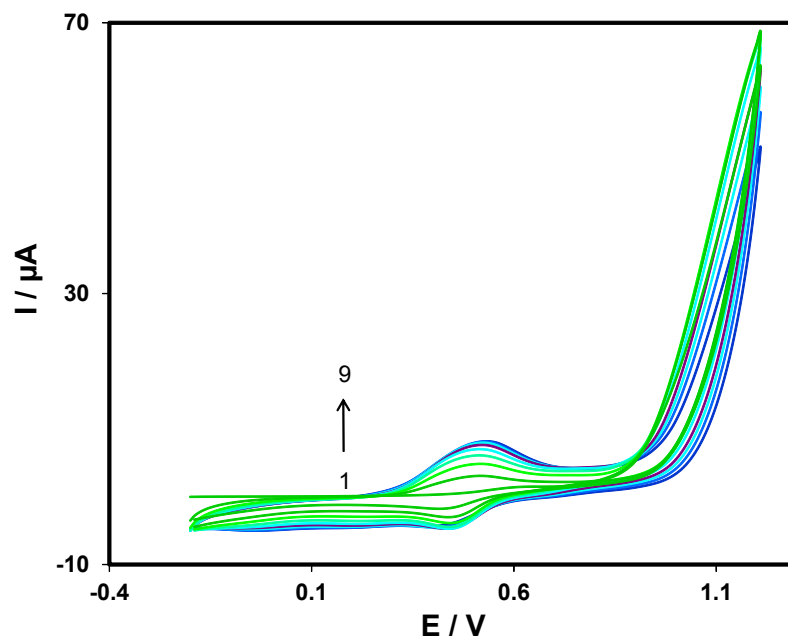

**Fig. 3S** Cyclic voltammograms in the course of polymerization of 10 mM AA at 9 times of potential scanning in acetonitrile containing 0.1 M tetrabutylammonium perchlorate.

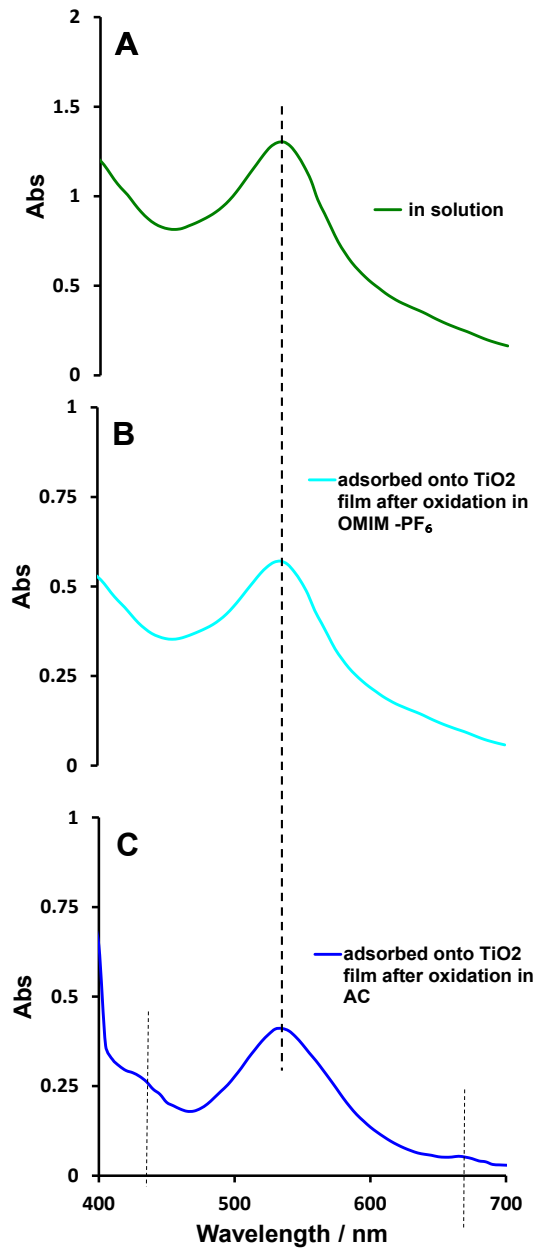

**Fig. 4S** (A) UV/Vis absorption spectrum for 0.04 mM N719 in a mixture of acetonitrile and tertbutyl alcohol (volume ratio, 1:1) (B) UV/Vis absorption spectrum for N719 adsorbed onto a TiO<sub>2</sub> electrode/N719 after electropolymerization of AA in OMIM-PF<sub>6</sub> (electrode B). (C) UV/Vis absorption spectrum for N719 adsorbed onto a TiO<sub>2</sub> electrode/N719 after electropolymerization of AA in acetonitrile 0.1 M tetrabutylammonium perchlorate.

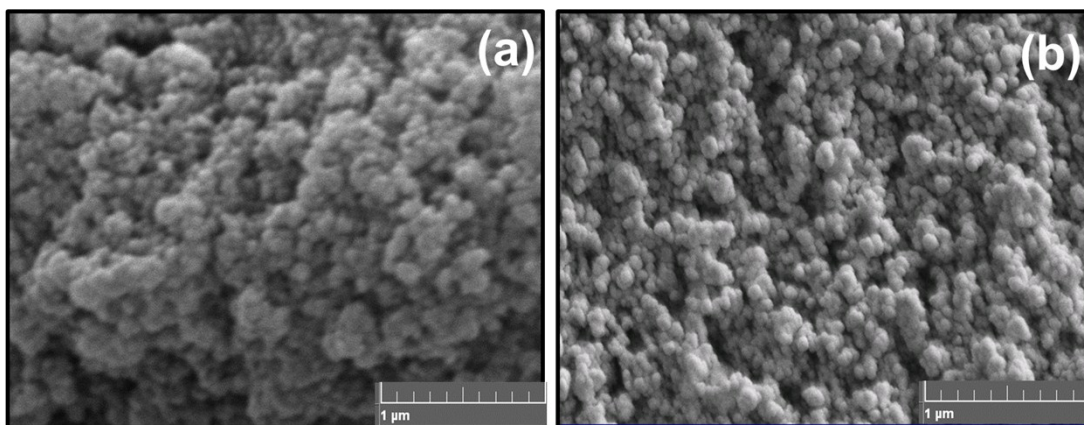

**Fig. 5S** SEM photographs of the electrode B (a) and electrode A (b).

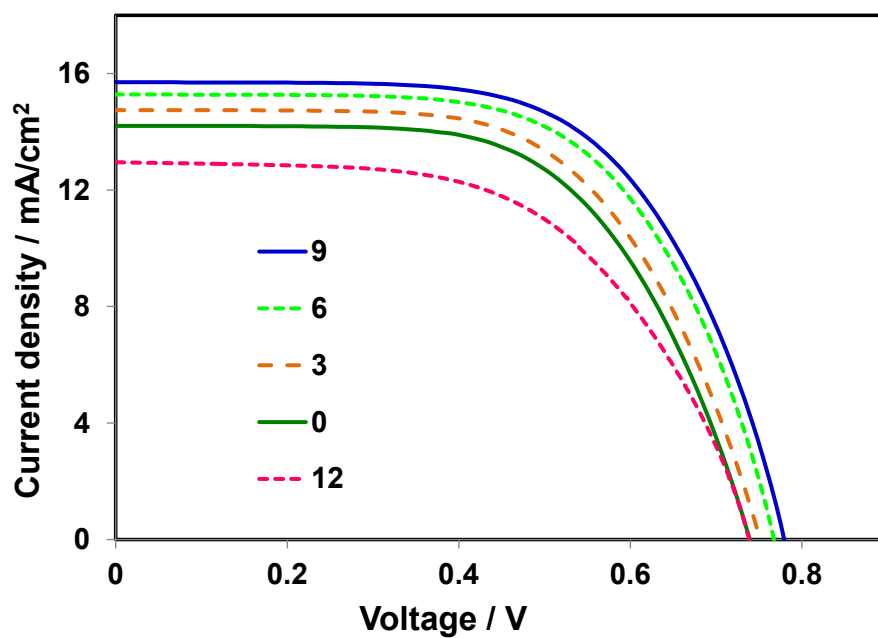

**Fig. 6S** Representative photocurrent–voltage curves for DSCs sensitized with N719 plus PAA under varying cycle number.

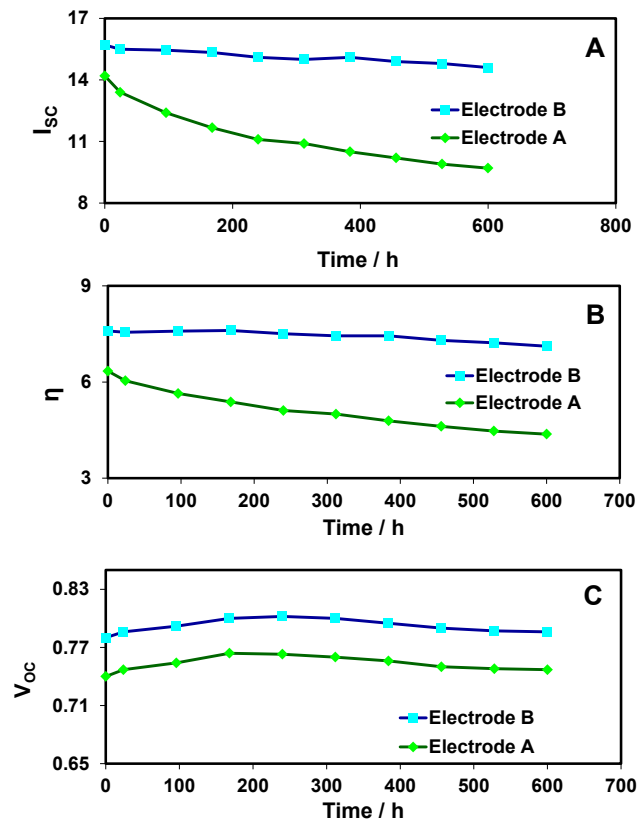

**Fig. 7S** Evolution of (A) the current density (mA cm<sup>-2</sup>), (B) the conversion efficiency ( $\eta$ ) and (C) open circuit voltage of electrode A (N719) and electrode B (N719 encapsulated by PAA). These devices were aged at 60 °C in the dark.

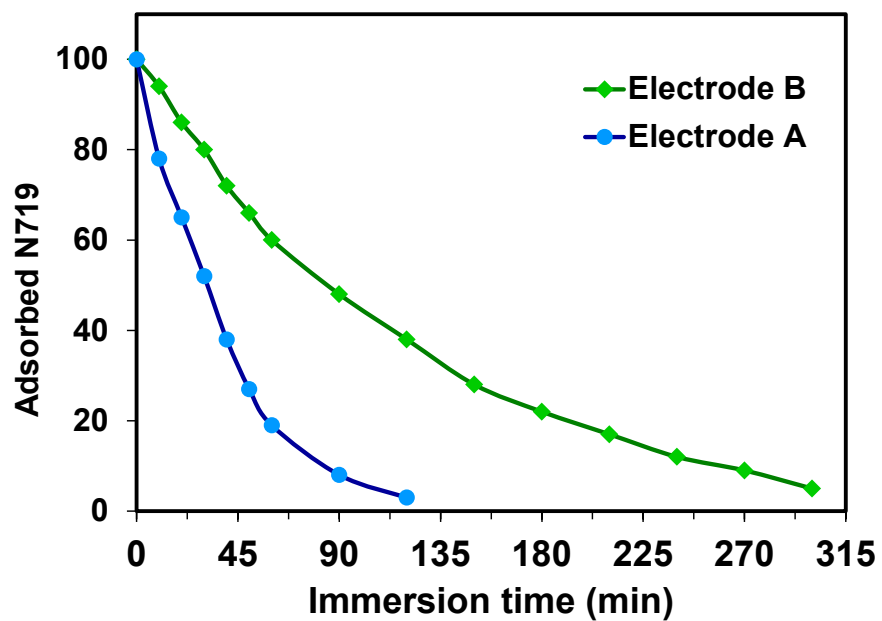

**Fig. 8S** Relative adsorbed N719 on electrode A and B by detaching with KOH aqueous solution as a function of immersion time. This indicated that the adsorbed N719 on electrode B are more resistance for the detachment due to the polymer film insulating N719.
